# Supplementary material for: HER3 PET Imaging: 68Ga-Labeled Affibody Molecules Provide Superior HER3 Contrast to 89Zr-Labeled Antibody and Antibody-Fragment-Based Tracers
Source: MDPI journal article supplement (doi:10.3390/cancers13194791), 2021-09-24
Supplement: s1 [file s1]

## HER3 PET-imaging: $^{68}\text{Ga}$ -labeled affibody molecules provide superior HER3 contrast to $^{89}\text{Zr}$ -labeled antibody and antibody-fragment based tracers

### Results

#### Characterization

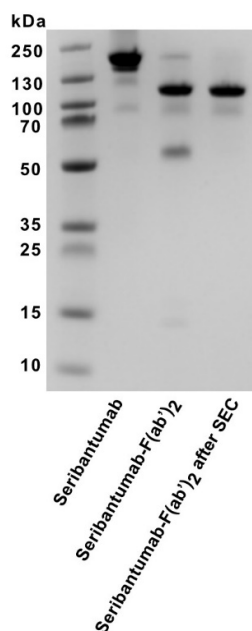

**Figure S1:** SDS-PAGE showing molecular weight marker (lane 1), intact seribantumab (lane 2), seribantumab-F(ab')<sub>2</sub> after pepsin digestion (lane 3), and successful removal of intact seribantumab and Fc fragments by SEC purification (lane 4).

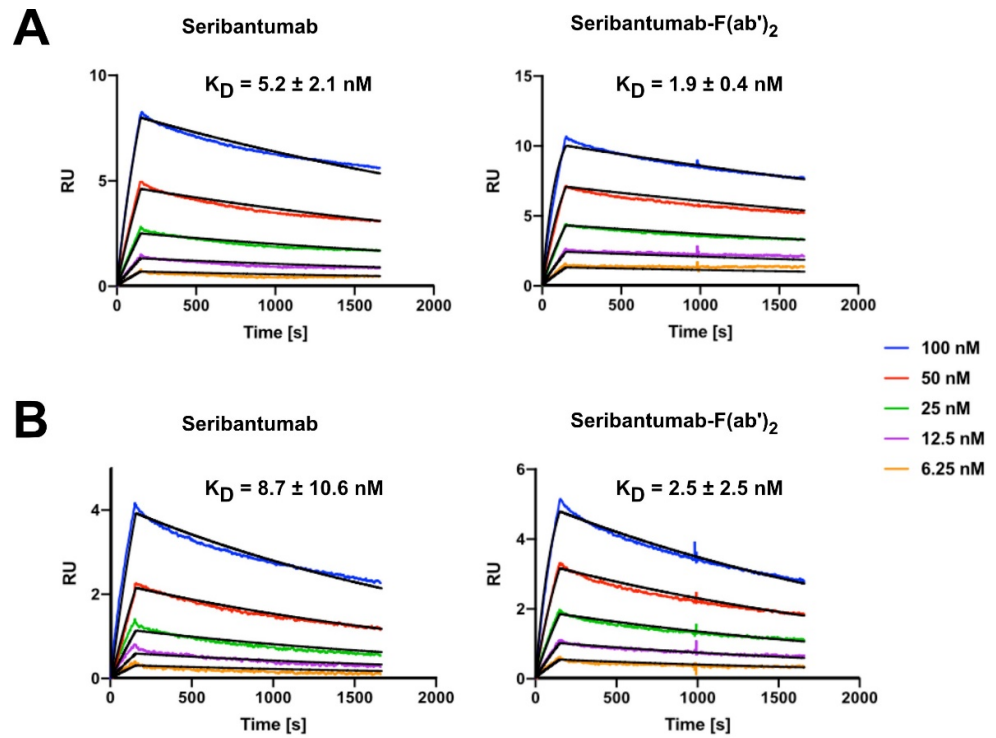

**Figure S2:** Representative SPR sensorgrams showing binding kinetics against immobilized (A) human HER3 and (B) murine ErbB3 for seribantumab and seribantumab- $F(ab')_2$ . The experimental data (colored curves) were fitted using a Langmuir 1:1 model (black curves) to approximate kinetic constants. The  $K_D$ -values ( $\pm$  SD) are presented as the average obtained from two surfaces with different immobilization levels.

*In vivo studies*

**Table S1:** Biodistribution of [<sup>68</sup>Ga]Ga-DFO-seribantumab-F(ab')<sub>2</sub>, [<sup>89</sup>Zr]Zr-DFO-seribantumab-F(ab')<sub>2</sub>, [<sup>89</sup>Zr]Zr-DFO-seribantumab and [<sup>68</sup>Ga]Ga-Z<sub>HER3</sub> in balb/c nu/nu mice with HER3-expressing BxPC-3 xenografts presented as %ID/g. Data is presented as average of n=4-6 mice with SD. Data for GI-tract and body is presented as %ID. Significant difference (p<0.05) between groups is indicated by <sup>a</sup> vs [<sup>68</sup>Ga]Ga-DFO-seribantumab-F(ab')<sub>2</sub> <sup>b</sup>vs. [<sup>89</sup>Zr]Zr-DFO-seribantumab-F(ab')<sub>2</sub> 3 h pi, <sup>c</sup> vs. [<sup>89</sup>Zr]Zr-DFO-seribantumab-F(ab')<sub>2</sub> 24 h pi, <sup>d</sup> vs. [<sup>89</sup>Zr]Zr-DFO-seribantumab-F(ab')<sub>2</sub> 48 h pi, <sup>e</sup> vs. [<sup>89</sup>Zr]Zr-DFO-seribantumab 48 h pi, <sup>f</sup>vs. [<sup>89</sup>Zr]Zr-DFO-seribantumab 96 h pi, <sup>\*</sup>vs. [<sup>68</sup>Ga]Ga-Z<sub>HER3</sub>. Statistical significance was done by two-tailed unpaired t-test, except for comparison of data from [<sup>68</sup>Ga]Ga-DFO-seribantumab-F(ab')<sub>2</sub> and [<sup>89</sup>Zr]Zr-DFO-seribantumab-F(ab')<sub>2</sub> 3 h pi when a two-tailed paired t-test was used, due to a dual isotope approach.

| Organ           | [ <sup>68</sup> Ga]Ga-DFO-seribantumab-F(ab') <sub>2</sub><br>3 h pi | [ <sup>89</sup> Zr]Zr-DFO-seribantumab-F(ab') <sub>2</sub> |                              |                              | [ <sup>89</sup> Zr]Zr-DFO-seribantumab |                                | [ <sup>68</sup> Ga]Ga-Z <sub>HER3</sub><br>3 h pi |
|-----------------|----------------------------------------------------------------------|------------------------------------------------------------|------------------------------|------------------------------|----------------------------------------|--------------------------------|---------------------------------------------------|
|                 |                                                                      | 3h pi                                                      | 24 h pi                      | 48 h pi                      | 48 h pi                                | 96 h pi                        |                                                   |
| Blood           | 23 ± 4 <sup>b,c,d,e,f,*</sup>                                        | 14 ± 2 <sup>a,c,d,e,f,*</sup>                              | 0.58 ± 0.04 <sup>a,b</sup>   | 0.23 ± 0.04 <sup>a,b</sup>   | 2.1 ± 0.2 <sup>a,b</sup>               | 0.7 ± 0.1 <sup>a,b</sup>       | 0.2 ± 0.07 <sup>a,b</sup>                         |
| Salivary        | 4 ± 0.9 <sup>b,c,d,f,*</sup>                                         | 2.6 ± 0.3 <sup>a,c,d,*</sup>                               | 1.9 ± 0.2 <sup>a,b,e,f</sup> | 1.4 ± 0.2 <sup>a,b,e,f</sup> | 3.6 ± 0.5 <sup>c,*</sup>               | 3.1 ± 0.3 <sup>a,c,*</sup>     | 1.3 ± 0.1 <sup>a,b,e,f</sup>                      |
| Lungs           | 13 ± 2 <sup>b,c,d,e,f,*</sup>                                        | 7.3 ± 0.6 <sup>a,c,d,e,f,*</sup>                           | 1.7 ± 0.2 <sup>a,b</sup>     | 1.3 ± 0.1 <sup>a,b</sup>     | 2.7 ± 0.5 <sup>a,b</sup>               | 1.8 ± 0.2 <sup>a,b</sup>       | 1.05 ± 0.08 <sup>a,b</sup>                        |
| Liver           | 32 ± 5 <sup>b,c,d,e,f,*</sup>                                        | 10.6 ± 0.6 <sup>*</sup>                                    | 8.2 ± 0.3 <sup>a,*</sup>     | 8.2 ± 0.9 <sup>a,*</sup>     | 8.6 ± 0.7 <sup>a,*</sup>               | 8.5 ± 0.8 <sup>a,*</sup>       | 3.4 ± 0.4 <sup>a,b,c,d,e,f</sup>                  |
| Stomach         | 3.3 ± 0.5 <sup>b,c,d,e,f,*</sup>                                     | 2.6 ± 0.3 <sup>a,c,d</sup>                                 | 1.5 ± 0.2 <sup>a,b</sup>     | 1.1 ± 0.2 <sup>a,b,f</sup>   | 2.1 ± 0.4 <sup>a,f,*</sup>             | 1.3 ± 0.1 <sup>a,d,e</sup>     | 1.4 ± 0.2 <sup>a,b,e</sup>                        |
| Spleen          | 16 ± 3 <sup>b,c,d,e,f,*</sup>                                        | 5.9 ± 0.6 <sup>a,c,d,*</sup>                               | 3.0 ± 0.4 <sup>a,b,*</sup>   | 3.1 ± 0.3 <sup>a,b,*</sup>   | 3 ± 1 <sup>a,b,*</sup>                 | 3.7 ± 0.6 <sup>a,*</sup>       | 0.39 ± 0.0 <sup>a,b,c,d,e,f</sup>                 |
| Small Intestine | 13 ± 2 <sup>b,c,d,e,f,*</sup>                                        | 6.6 ± 0.7 <sup>a</sup>                                     | 3.8 ± 0.2 <sup>a,b,d</sup>   | 2.3 ± 0.4 <sup>a,b,c,e</sup> | 7 ± 1 <sup>a,d,f,*</sup>               | 2.4 ± 0.2 <sup>a,b,e</sup>     | 4.0 ± 0.9 <sup>a,b,e</sup>                        |
| Kidney          | 70 ± 7 <sup>e,f,*</sup>                                              | 41 ± 3 <sup>e,f,*</sup>                                    | 48 ± 7 <sup>e,f,*</sup>      | 40 ± 8 <sup>e,f,*</sup>      | 7.0 ± 0.5 <sup>a,b,c,d,*</sup>         | 4.8 ± 0.2 <sup>a,b,c,d,*</sup> | 230 ± 37 <sup>a,b,c,d,e,f</sup>                   |
| Tumor           | 11 ± 3 <sup>b,c,d,e,f,*</sup>                                        | 7 ± 2 <sup>a,d,*</sup>                                     | 4.0 ± 0.9 <sup>a</sup>       | 3.5 ± 0.6 <sup>a,b</sup>     | 5.6 ± 0.4 <sup>a</sup>                 | 4.7 ± 0.8 <sup>a</sup>         | 2.6 ± 0.3 <sup>a,b</sup>                          |
| Muscle          | 1.72 ± 0.10 <sup>b,c,d,e,f,*</sup>                                   | 1.19 ± 0.10 <sup>a,c,d,e,f,*</sup>                         | 0.41 ± 0.06 <sup>a,b</sup>   | 0.32 ± 0.03 <sup>a,b</sup>   | 0.6 ± 0.2 <sup>a,b,*</sup>             | 0.7 ± 0.4 <sup>a,b,*</sup>     | 0.12 ± 0.02 <sup>a,b,e,f</sup>                    |
| Bone            | 3.3 ± 1.0 <sup>e,*</sup>                                             | 2.2 ± 2 <sup>e,*</sup>                                     | 3.4 ± 0.2 <sup>e,*</sup>     | 3.5 ± 0.7 <sup>e,*</sup>     | 5.9 ± 0.5 <sup>a,b,c,d,*</sup>         | 4 ± 2 <sup>*</sup>             | 0.24 ± 0.05 <sup>a,b,c,d,e,f</sup>                |
| GI              | 19 ± 2 <sup>c,d,e,f,*</sup>                                          | 17 ± 7 <sup>c,d,e,f,*</sup>                                | 7 ± 1 <sup>a,b</sup>         | 3.3 ± 0.3 <sup>a,b,e</sup>   | 11 ± 0.9 <sup>a,b,d,f</sup>            | 4.7 ± 0.6 <sup>a,b,e</sup>     | 6 ± 1 <sup>a,b</sup>                              |
| Body            | 38 ± 6 <sup>b,c,d,e,f,*</sup>                                        | 19 ± 9 <sup>a,*</sup>                                      | 16 ± 1 <sup>a,*</sup>        | 14 ± 1 <sup>a,e</sup>        | 25 ± 2 <sup>a,d</sup>                  | 21 ± 1 <sup>a,*</sup>          | 6.3 ± 0.7 <sup>a,b,c,d,f,*</sup>                  |

**Table S2:** Tumor-to-organ ratios for [<sup>68</sup>Ga]Ga-DFO-seribantumab-F(ab')<sub>2</sub>, [<sup>89</sup>Zr]Zr-DFO-seribantumab-F(ab')<sub>2</sub>, [<sup>89</sup>Zr]Zr-DFO-seribantumab and [<sup>68</sup>Ga]Ga-Z<sub>HER3</sub> in balb/c nu/nu mice with HER3-expressing BxPC-3 xenografts. Data is presented as average of n=4-6 mice with SD. Significant difference (p<0.05) between groups is indicated by <sup>a</sup> vs [<sup>68</sup>Ga]Ga-DFO-seribantumab-F(ab')<sub>2</sub>, <sup>b</sup> vs. [<sup>89</sup>Zr]Zr-DFO-seribantumab-F(ab')<sub>2</sub> 3 h pi, <sup>c</sup> vs. [<sup>89</sup>Zr]Zr-DFO-seribantumab-F(ab')<sub>2</sub> 24 h pi, <sup>d</sup> vs. [<sup>89</sup>Zr]Zr-DFO-seribantumab-F(ab')<sub>2</sub> 48 h pi, <sup>e</sup> vs. [<sup>89</sup>Zr]Zr-DFO-seribantumab 48 h pi, <sup>f</sup> vs. [<sup>89</sup>Zr]Zr-DFO-seribantumab 96 h pi, <sup>\*</sup> vs. [<sup>68</sup>Ga]Ga-Z<sub>HER3</sub>. Statistical significance was done by two-tailed unpaired t-test, except for comparison of data from [<sup>68</sup>Ga]Ga-DFO-seribantumab-F(ab')<sub>2</sub> and [<sup>89</sup>Zr]Zr-DFO-seribantumab-F(ab')<sub>2</sub> 3 h pi when a two-tailed paired t-test was used, due to a dual isotope approach.

| Organ           | [ <sup>68</sup> Ga]Ga-DFO-seribantumab-F(ab') <sub>2</sub><br>3 h pi | [ <sup>89</sup> Zr]Zr-DFO-seribantumab-F(ab') <sub>2</sub> |                            |                             | [ <sup>89</sup> Zr]Zr-DFO-seribantumab |                                  | [ <sup>68</sup> Ga]Ga-Z <sub>HER3</sub><br>3 h pi |
|-----------------|----------------------------------------------------------------------|------------------------------------------------------------|----------------------------|-----------------------------|----------------------------------------|----------------------------------|---------------------------------------------------|
|                 |                                                                      | 3h pi                                                      | 24 h pi                    | 48 h pi                     | 48 h pi                                | 96 h pi                          |                                                   |
| Blood           | 0.45 ± 0.09 <sup>c,d,f,*</sup>                                       | 0.5 ± 0.1 <sup>c,d,f,*</sup>                               | 7 ± 2 <sup>a,b,d</sup>     | 15 ± 4 <sup>a,b,c,e,f</sup> | 2.7 ± 0.4 <sup>d,*</sup>               | 6 ± 2 <sup>a,b,d,*</sup>         | 11 ± 2 <sup>a,b,e,f</sup>                         |
| Salivary        | 2.6 ± 0.6 <sup>e,f</sup>                                             | 2.6 ± 0.5 <sup>e,f</sup>                                   | 2.1 ± 0.3                  | 2.4 ± 0.7                   | 1.6 ± 0.2 <sup>a,b</sup>               | 1.5 ± 0.3 <sup>a,b</sup>         | 2.0 ± 0.3                                         |
| Lungs           | 0.8 ± 0.2 <sup>c,e,d,f,*</sup>                                       | 0.9 ± 0.2 <sup>c,d,e,f,*</sup>                             | 2.3 ± 0.3                  | 2.7 ± 0.6                   | 2.2 ± 0.4                              | 2.7 ± 0.6                        | 2.4 ± 0.3                                         |
| Liver           | 0.33 ± 0.05 <sup>b,e,*</sup>                                         | 0.6 ± 0.2                                                  | 0.5 ± 0.1 <sup>*</sup>     | 0.4 ± 0.1 <sup>*</sup>      | 0.66 ± 0.08                            | 0.6 ± 0.1                        | 0.74 ± 0.05 <sup>a,c,d</sup>                      |
| Stomach         | 3 ± 1                                                                | 2.6 ± 0.6                                                  | 2.6 ± 0.2                  | 3 ± 1                       | 2.7 ± 0.06                             | 3.6 ± 0.7 <sup>*</sup>           | 1.9 ± 0.2 <sup>f</sup>                            |
| Spleen          | 0.7 ± 0.1 <sup>e,*</sup>                                             | 1.2 ± 0.3 <sup>*</sup>                                     | 1.3 ± 0.2 <sup>*</sup>     | 1.1 ± 0.3 <sup>*</sup>      | 3 ± 1 <sup>a,*</sup>                   | 1.3 ± 0.4 <sup>*</sup>           | 6.4 ± 0.8 <sup>a,b,c,d,e,f</sup>                  |
| Small Intestine | 0.8 ± 0.1 <sup>c,f</sup>                                             | 1.0 ± 0.2 <sup>f</sup>                                     | 1.1 ± 0.2 <sup>a,f</sup>   | 1.5 ± 0.5 <sup>*</sup>      | 0.9 ± 0.2 <sup>f</sup>                 | 2.0 ± 0.5 <sup>a,b,c,e,*</sup>   | 0.7 ± 0.2 <sup>d</sup>                            |
| Kidney          | 0.1 ± 0.03 <sup>e,f</sup>                                            | 0.17 ± 0.04 <sup>e,f</sup>                                 | 0.08 ± 0.02 <sup>e,f</sup> | 0.09 ± 0.03 <sup>e,f</sup>  | 0.81 ± 0.07 <sup>a,b,c,d,f,*</sup>     | 1.0 ± 0.2 <sup>a,b,c,d,e,*</sup> | 0.011 ± 0.003 <sup>e,f</sup>                      |
| Muscle          | 6 ± 2 <sup>*</sup>                                                   | 6 ± 1 <sup>*</sup>                                         | 10 ± 2 <sup>*</sup>        | 11 ± 2 <sup>*</sup>         | 10 ± 4 <sup>*</sup>                    | 8 ± 2 <sup>*</sup>               | 21 ± 6 <sup>a,b,c,d,e,f</sup>                     |
| Bone            | 3.2 ± 0.5 <sup>*</sup>                                               | 3.1 ± 0.7 <sup>*</sup>                                     | 1.2 ± 0.3 <sup>*</sup>     | 1.1 ± 0.5 <sup>*</sup>      | 0.95 ± 0.09 <sup>*</sup>               | 2 ± 2 <sup>*</sup>               | 11 ± 2 <sup>a,b,c,d,e,f</sup>                     |

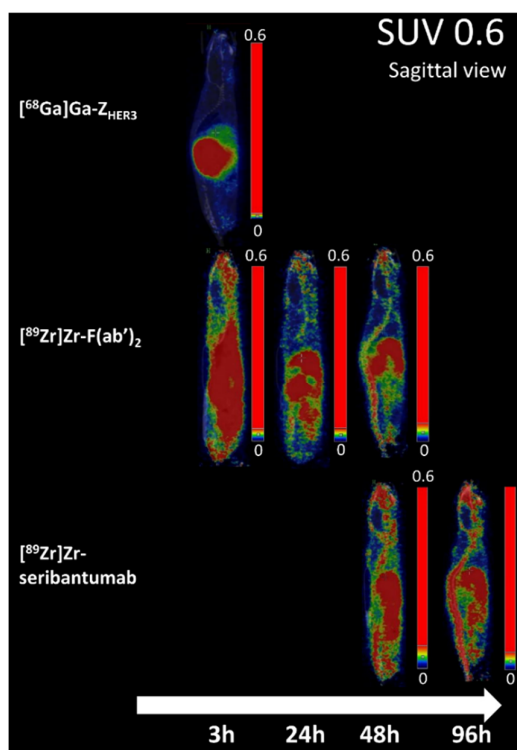

**Figure S3:** nanoPET/CT images, sagittal view. For imaging mice were injected with 1.18 MBq (27 µg) [<sup>89</sup>Zr]Zr-DFO-seribantumab-F(ab')<sub>2</sub>, 1.38 MBq (35 µg) [<sup>89</sup>Zr]Zr-DFO-seribantumab, or 7.05 MBq (2 µg) [<sup>68</sup>Ga]Ga-Z<sub>HER3</sub>.
